# Supplementary material for: Fear of eyes: triadic relation among social anxiety, trypophobia, and discomfort for eye cluster
Source: PeerJ. 2016 May 5;4:e1942. doi: 10.7717/peerj.1942 (PMC4860305; doi:10.7717/peerj.1942)
Supplement: Data S2 — The file consists of three sheets. First sheet shows Liebowitz social anxiety scale scores. Second has Trypophobia questionnaire scores, and Third sheet contains discomfort rating scores about trypophobic eye-images. [file peerj-04-1942-s002.xlsx]

## Sheet: liebowitz social anxiety scale
Fear or Anxiety section	No.	Telephoning in public	Participating in small groups	Eating in public places	Drinking with others in public places	Talking to people in authority	Acting, performing or giving a talk in front of an audience	Going to a party	Working while being observed	Writing while being observed	Calling someone you don't know very well	Talking with people you don't know very well	Meeting strangers	Urinating in a public bathroom	Entering a room when others are already seated	Being the center of attention	Speaking up at a meeting	Taking a test	Expressing a disagreement or disapproval to people you don't know very	Looking at people you don't know very well in the eyes	Giving a report to a group	Trying to pick up someone	Returning goods to a store	Giving a party	Resisting a high pressure salesperson		Avoidance section	No.	Telephoning in public	Participating in small groups	Eating in public places	Drinking with others in public places	Talking to people in authority	Acting, performing or giving a talk in front of an audience	Going to a party	Working while being observed	Writing while being observed	Calling someone you don't know very well	Talking with people you don't know very well	Meeting strangers	Urinating in a public bathroom	Entering a room when others are already seated	Being the center of attention	Speaking up at a meeting	Taking a test	Expressing a disagreement or disapproval to people you don't know very	Looking at people you don't know very well in the eyes	Giving a report to a group	Trying to pick up someone
	1	2	2	2	2	1	3	2	3	3	3	3	3	2	2	3	2	2	2	2	2	3	2	2	3			1	2	2	2	2	1	3	3	2	2	3	3	2	1	2	3	2	2	2	2	2	2
	2	3	3	3	2	4	4	4	4	2	4	3	3	2	2	4	2	3	4	3	1	2	2	4	4			2	2	3	3	3	3	2	4	2	1	2	2	2	1	1	2	3	2	3	2	1	2
	3	3	2	2	2	3	2	1	3	3	2	2	2	2	2	2	2	2	2	3	1	2	1	1	3			3	2	2	2	2	1	3	3	2	2	2	2	2	2	2	2	3	2	3	3	3	2
	4	1	1	2	1	3	1	1	2	1	1	2	2	2	1	1	1	1	1	2	1	2	1	1	1			4	1	1	1	1	2	1	1	3	1	1	2	3	1	1	1	1	1	1	2	1	1
	5	1	1	1	1	3	1	1	1	1	1	1	1	1	1	1	1	1	1	1	1	2	1	1	1			5	1	4	1	2	1	4	4	1	1	2	2	2	1	1	4	2	1	2	2	2	2
	6	3	2	2	3	1	2	2	3	1	1	2	2	3	2	3	2	1	1	1	2	3	1	2	1			6	1	1	4	2	3	3	1	1	2	2	3	4	1	3	2	4	4	4	2	3	2
	7	2	2	2	2	1	2	2	2	2	2	2	2	2	2	2	2	2	3	2	2	3	2	2	2			7	3	3	3	3	3	3	3	3	3	3	3	3	3	3	3	3	3	3	3	3	3
	8	2	2	2	2	1	2	2	2	2	2	2	2	2	2	2	2	2	2	2	2	2	2	2	2			8	2	2	2	2	1	3	2	2	2	2	2	2	2	2	3	2	2	3	2	2	2
	9	3	3	2	2	1	4	2	2	2	4	3	4	1	3	3	2	2	2	3	1	2	2	4	2			9	3	3	3	2	1	3	3	2	1	4	2	2	1	2	3	2	1	2	3	1	2
	10	3	1	1	4	3	1	1	1	4	1	1	2	1	1	1	4	1	1	2	1	1	1	1	1			10	1	4	1	1	2	4	4	2	2	1	4	1	1	1	4	1	1	2	2	1	4
	11	1	1	1	1	3	1	1	1	1	1	2	1	1	3	1	1	1	1	1	1	1	1	2	1			11	1	2	1	1	2	1	1	1	1	1	2	1	1	3	2	1	1	1	1	1	1
	12	3	2	2	3	1	3	3	2	3	2	2	3	2	3	3	3	2	3	1	2	3	3	3	2			12	3	2	2	2	3	4	2	2	4	2	4	2	2	2	4	3	2	4	1	3	4
	13	1	3	1	1	1	2	2	2	2	3	2	3	1	2	3	1	3	2	2	1	2	2	2	2			13	1	2	1	1	1	4	3	2	2	3	3	2	1	1	3	1	1	2	2	1	3
	14	2	1	2	1	1	2	2	2	2	2	2	3	2	2	2	2	2	2	2	2	2	2	2	1			14	3	1	3	4	4	1	4	4	4	4	1	4	4	1	4	1	4	4	4	4	1
	15	2	3	2	2	1	2	2	3	2	3	3	2	1	3	3	2	3	2	3	1	3	2	3	2			15	2	3	2	2	1	4	4	3	1	2	4	3	1	4	4	4	2	4	4	2	4
	16	1	2	2	2	3	4	2	2	2	2	3	2	1	1	3	2	3	1	2	1	2	1	3	3			16	2	1	1	2	1	2	2	1	1	2	2	2	1	2	2	2	2	2	2	1	1
	17	2	2	2	1	1	4	4	4	2	2	4	2	2	2	4	3	2	3	2	2	2	2	4	4			17	2	2	2	1	3	4	4	2	1	2	4	2	1	1	4	4	2	3	3	4	4
	18	4	1	4	1	4	1	1	1	1	1	1	1	4	1	1	1	1	1	1	1	1	1	1	1			18	4	4	2	4	2	4	4	4	4	4	4	4	3	4	4	4	4	4	4	4	4
	19	2	2	1	1	1	3	2	2	1	2	3	2	1	2	2	2	2	2	1	2	1	2	4	1			19	1	1	1	1	2	4	1	2	1	1	1	1	1	1	3	1	1	1	1	1	1
	20	3	1	1	2	3	1	1	2	1	1	1	1	1	1	1	1	4	1	1	1	1	1	1	3			20	1	1	2	3	3	2	3	4	3	2	3	4	4	2	3	2	4	1	1	2	1
	21	2	1	1	2	1	1	1	2	2	2	2	2	2	1	1	2	1	1	2	2	1	1	1	1			21	2	2	3	3	1	3	2	2	2	3	3	2	2	2	3	3	3	3	3	3	2
	22	3	3	1	2	1	4	4	3	3	4	4	4	2	2	3	3	3	3	2	2	2	3	4	3			22	2	3	1	1	3	3	4	3	2	4	4	4	2	2	3	3	2	3	4	2	3
	23	2	4	2	2	4	4	4	4	2	4	4	4	3	4	4	3	4	4	2	4	3	3	4	4			23	4	4	3	3	4	4	4	4	3	4	4	4	3	4	4	4	4	3	4	3	3
	24	4	3	4	4	4	4	1	4	2	3	2	4	4	4	3	3	2	2	4	4	3	1	1	4			24	1	1	1	1	2	1	1	1	1	1	1	1	1	1	1	1	1	1	1	1	1
	25	2	3	2	2	1	3	2	2	3	4	2	3	3	3	3	3	3	3	2	2	2	2	2	3			25	3	2	2	2	1	2	2	2	2	2	3	2	3	2	2	2	2	3	2	2	2
	26	3	3	2	2	3	4	2	3	3	2	3	3	1	3	4	3	4	4	2	3	2	3	1	3			26	2	1	1	1	2	1	1	1	1	1	1	1	1	1	2	1	1	2	1	1	1
	27	2	2	3	3	3	3	3	2	1	2	2	2	4	2	2	2	1	2	3	2	3	1	3	3			27	1	2	3	2	3	1	1	2	2	3	3	3	2	2	1	1	3	1	2	2	1
	28	2	2	2	2	1	2	2	2	2	2	2	3	1	2	2	2	2	2	2	2	2	2	2	1			28	2	2	2	2	1	2	2	2	2	2	2	2	2	2	2	2	2	2	2	2	2
	29	1	2	2	1	3	1	1	1	1	1	2	2	1	1	1	1	1	1	1	1	1	1	1	1			29	1	1	1	1	2	1	1	1	1	1	1	1	1	1	1	1	1	1	1	1	1
	30	3	3	2	1	4	1	1	2	1	1	3	3	3	4	1	3	1	2	2	4	1	1	1	1			30	1	1	2	1	2	1	3	2	2	1	2	2	3	1	1	1	1	2	2	1	3
	31	4	4	2	3	4	4	3	3	2	4	4	2	2	4	4	4	4	4	2	3	4	4	4	4			31	3	4	1	2	1	4	4	3	1	4	4	1	1	1	3	4	3	4	2	4	4
	32	2	3	2	1	3	4	2	2	1	4	2	4	2	3	2	2	2	3	2	2	2	2	4	2			32	2	2	1	1	1	3	3	1	1	3	2	2	2	2	2	2	1	4	2	1	1
	33	1	2	2	1	1	1	2	1	2	1	2	1	2	1	1	1	1	1	3	1	2	2	3	1			33	1	2	1	1	2	1	3	1	1	2	2	2	1	1	1	2	3	1	3	1	2
	34	3	1	1	1	3	1	1	1	1	1	1	1	1	1	1	1	1	1	2	1	1	1	1	1			34	2	4	4	4	4	4	4	4	4	4	4	4	4	4	4	4	4	4	4	4	4
	35	2	1	2	1	1	2	1	1	2	1	2	2	2	2	3	1	2	2	2	2	2	2	1	3			35	2	1	2	2	1	3	2	3	2	2	2	2	2	2	3	3	2	3	2	2	2
	36	2	2	1	2	3	1	1	1	1	2	2	1	2	2	1	1	1	1	1	1	1	1	1	1			36	1	1	1	1	2	1	2	3	1	1	1	1	1	1	1	1	2	1	1	3	1
	37	2	2	2	1	4	4	2	3	3	3	2	3	1	3	4	4	3	3	3	2	3	2	4	2			37	2	1	1	1	4	4	4	3	3	4	3	3	2	3	4	2	4	4	3	1	3
	38	2	2	1	1	1	3	2	2	3	2	2	2	1	2	2	2	3	2	2	2	2	2	2	2			38	2	1	1	1	1	3	2	1	2	2	2	1	1	1	3	2	1	2	2	2	1
	39	4	4	3	3	4	4	4	4	4	4	4	4	2	4	4	4	4	4	4	4	4	2	4	3			39	4	3	2	2	3	4	3	4	3	4	4	4	1	4	4	4	4	4	3	4	4
	40	2	1	2	2	3	2	1	2	1	1	2	2	2	1	1	1	1	1	2	2	2	1	1	1			40	2	2	1	1	1	2	2	2	1	2	3	2	1	1	2	2	1	3	1	1	2
	41	2	2	2	2	3	1	1	2	1	1	2	2	1	2	2	1	1	1	2	2	2	1	1	1			41	3	1	1	1	4	3	3	3	1	3	3	3	3	4	3	2	1	3	2	1	3
	42	2	2	2	1	1	2	1	2	1	3	3	2	1	2	3	2	2	2	1	2	2	1	2	1			42	1	2	2	1	3	2	2	2	1	1	2	2	2	2	3	2	3	1	1	1	2
	43	2	2	1	1	1	2	2	1	1	1	2	2	1	2	1	1	2	1	2	2	1	2	2	3			43	2	1	1	1	1	2	1	2	1	1	2	2	2	2	2	2	2	1	2	1	2
	44	4	3	3	2	4	4	3	4	4	4	4	4	2	3	3	4	4	4	4	4	4	3	4	4			44	4	3	2	2	4	4	4	4	4	4	4	4	2	3	4	4	4	4	4	4	3
	45	1	3	1	1	1	2	2	2	1	1	1	1	3	2	3	2	2	2	1	2	2	4	2	2			45	2	4	1	4	3	2	4	2	3	2	4	2	2	2	3	3	2	3	2	2	4
	46	1	1	2	1	1	2	2	1	2	1	1	1	1	2	3	2	2	1	1	1	2	1	2	2			46	1	1	3	1	2	2	2	1	1	1	2	2	1	2	3	3	1	1	1	2	2
	47	3	2	2	3	4	4	3	3	3	4	4	4	2	3	4	4	3	2	3	2	3	3	4	4			47	4	3	4	2	4	4	4	4	4	4	4	4	2	4	4	4	4	2	4	4	4
	48	2	1	2	1	1	3	2	2	2	3	3	3	2	2	2	2	2	3	3	1	2	2	3	2			48	1	1	1	1	1	2	2	2	1	2	2	3	2	1	2	1	1	3	2	1	1
	49	2	2	2	2	1	3	2	2	1	2	2	2	1	2	2	2	2	2	2	2	2	2	2	3			49	2	1	1	1	1	2	2	2	1	2	1	2	1	1	2	2	1	2	2	2	1
	50	1	1	1	1	3	1	1	4	4	4	4	1	1	1	3	1	1	1	1	1	1	1	1	1			50	1	1	1	1	2	1	1	4	1	4	1	4	1	1	4	1	1	1	1	1	1
	51	3	2	1	2	1	2	2	2	2	2	2	3	2	2	2	2	2	3	3	3	1	2	1	2			51	3	3	1	2	1	2	2	2	1	2	3	3	2	1	2	3	3	2	2	2	2
	52	2	2	1	2	1	3	2	1	2	4	2	2	1	3	2	3	2	2	2	1	2	2	2	2			52	3	1	1	1	1	4	1	1	1	4	3	2	1	1	4	3	1	2	1	2	1
	53	3	3	1	2	3	4	4	2	2	3	3	3	3	3	3	3	2	2	2	2	2	3	4	2			53	2	2	1	1	1	2	3	1	1	2	2	2	2	2	2	2	1	2	1	1	2
	54	1	2	1	1	3	3	3	1	2	4	3	2	1	2	4	3	4	2	2	1	4	4	4	3			54	1	2	1	1	1	2	4	1	1	2	2	2	1	2	3	3	3	3	2	1	4
	55	2	1	1	2	1	2	2	1	1	2	2	2	1	2	2	2	2	2	1	1	2	2	2	2			55	1	1	1	2	2	1	2	1	1	1	1	1	1	1	1	1	1	2	1	1	1
	56	1	1	1	1	3	3	2	2	1	2	2	2	1	2	3	2	3	2	2	2	2	2	3	3			56	1	1	1	1	1	2	1	1	1	2	2	1	1	2	2	2	1	2	2	1	2
	57	4	4	2	4	1	1	4	4	4	4	4	4	1	4	1	4	1	2	4	4	4	2	2	2			57	4	4	2	4	4	4	4	4	4	4	4	4	1	4	1	4	1	1	4	4	4
	58	2	1	1	1	1	2	2	2	2	3	1	2	1	2	2	2	3	2	2	2	2	2	3	3			58	2	1	1	2	2	2	3	3	2	2	2	2	1	1	1	1	3	2	2	1	2
	59	2	1	2	2	1	2	2	2	2	2	2	2	2	2	2	2	2	2	2	2	2	2	2	2			59	2	2	2	2	1	2	2	2	2	2	2	2	2	2	2	2	2	2	2	2	2
	60	1	1	3	1	3	2	1	2	1	1	2	2	2	2	2	1	1	1	2	1	1	1	1	3			60	2	1	1	1	1	3	2	1	1	4	1	2	1	1	3	1	1	2	2	1	3
	61	2	3	2	2	3	3	2	2	2	2	3	3	2	2	3	3	3	4	3	2	2	4	3	3			61	2	3	1	1	3	3	3	3	2	3	2	3	1	2	3	2	1	2	3	1	2
	62	3	3	2	1	4	2	3	3	3	4	4	4	1	3	4	2	1	2	3	1	3	3	2	1			62	3	2	4	1	4	2	4	2	4	4	4	4	1	2	4	2	1	2	3	2	2
	63	1	1	1	2	1	1	3	2	2	3	3	3	1	2	3	3	2	2	1	2	3	3	4	2			63	2	2	1	3	1	3	3	2	2	4	2	3	1	2	3	4	1	2	2	1	3
	64	1	1	3	2	3	1	1	3	1	1	1	1	1	1	1	1	1	1	1	1	1	1	1	1			64	1	1	1	1	2	1	1	1	1	1	1	1	1	1	1	1	1	1	1	1	1
	65	2	2	1	2	3	3	2	2	2	2	3	3	2	3	3	3	3	3	2	2	2	2	2	2			65	2	3	1	2	1	3	2	2	3	2	3	2	2	2	4	2	1	2	2	2	2
	66	3	2	2	2	4	4	4	2	3	3	2	3	1	3	4	4	4	4	2	2	3	2	4	3			66	3	1	1	1	3	4	3	2	1	3	3	3	1	1	3	4	2	4	4	2	3
	67	1	1	2	1	1	1	2	2	1	1	1	1	3	1	1	2	2	1	1	2	2	1	1	1			67	3	3	1	1	3	3	2	3	3	3	3	2	2	3	3	3	1	3	1	1	3
	68	1	2	2	1	1	4	4	4	2	3	3	4	1	3	4	3	3	1	4	3	2	2	4	1			68	4	3	1	1	1	4	4	2	2	4	4	2	1	2	4	4	3	2	2	2	3
	69	1	1	3	3	3	1	1	1	1	1	1	2	2	1	1	3	1	2	1	3	1	1	1	1			69	1	4	1	1	4	4	4	4	4	1	1	2	1	4	4	1	4	4	4	1	4
	70	1	1	1	1	3	1	1	1	1	2	1	1	2	1	1	1	1	1	1	1	1	1	1	1			70	1	1	1	1	2	1	1	1	1	2	1	1	4	1	2	1	1	1	1	1	1
	71	1	1	1	1	1	1	1	2	2	1	1	1	2	2	1	1	1	2	1	1	1	2	1	3			71	1	1	1	1	2	1	1	2	2	1	1	1	2	1	1	1	1	2	1	1	1
	72	4	4	2	1	1	4	4	4	2	4	4	4	2	2	4	4	3	2	4	4	4	2	4	1			72	4	4	2	2	1	4	4	4	2	3	4	4	2	3	4	4	2	2	4	4	4
	73	1	1	1	1	1	1	1	1	2	3	2	2	1	1	2	2	2	3	2	1	1	3	2	1			73	1	1	1	1	2	1	1	1	1	1	1	1	1	1	1	1	1	1	1	1	1
	74	3	2	1	2	3	1	2	2	2	3	3	4	2	4	2	1	1	4	1	2	3	2	3	1			74	3	3	4	3	1	1	2	1	4	2	2	2	2	2	2	3	2	2	3	3	3
	75	2	2	1	2	3	3	2	1	1	2	2	2	1	3	2	2	2	1	2	2	2	2	2	1			75	1	2	1	2	2	3	3	1	1	2	2	1	1	3	2	2	1	1	2	2	2
	76	3	1	3	1	3	1	1	1	1	1	1	1	2	1	1	1	1	1	1	1	1	1	1	2			76	1	3	2	1	3	3	3	3	4	3	3	3	2	3	4	3	3	3	3	3	4
	77	1	3	1	1	3	3	2	1	1	2	2	2	1	2	2	3	3	2	2	1	1	2	4	2			77	1	4	2	2	1	3	3	1	1	4	2	2	1	2	3	2	2	3	2	2	2
	78	4	2	2	1	4	4	2	4	4	3	4	2	2	2	4	4	4	4	2	3	2	4	4	4			78	2	3	1	1	4	3	4	3	2	3	2	3	1	3	3	2	2	2	3	3	1
	79	2	3	2	2	3	3	4	3	3	2	3	2	2	3	4	3	3	4	2	3	3	3	4	3			79	4	4	3	4	4	4	4	2	4	4	4	4	3	4	4	4	4	3	2	4	4
	80	2	2	3	3	4	3	4	3	2	3	3	3	1	2	4	2	3	3	2	2	2	2	4	2			80	1	2	2	2	4	4	2	2	1	1	2	2	1	2	3	2	1	1	2	2	2
	81	2	1	1	1	3	1	1	4	3	2	1	2	1	1	1	1	1	1	4	1	1	1	1	1			81	1	4	3	4	3	4	4	1	1	1	3	1	3	4	4	4	4	4	1	1	4
	82	2	2	3	2	1	2	3	3	3	3	2	4	2	2	3	2	2	3	3	3	2	1	1	1			82	2	2	1	1	1	2	2	2	2	3	2	4	4	2	3	2	1	2	2	2	2
	83	3	2	3	1	1	2	3	2	2	1	2	2	3	2	3	2	1	1	3	2	3	2	3	2			83	4	4	4	4	4	4	4	4	3	1	4	4	4	4	4	4	1	1	3	4	4
	84	3	2	2	3	4	4	2	3	3	4	3	3	2	4	3	3	3	3	3	2	2	3	3	3			84	2	2	3	2	3	2	2	3	3	2	2	2	2	2	2	2	2	3	2	2	2
	85	2	2	1	2	1	2	2	1	2	2	2	2	1	2	2	2	2	2	2	2	2	2	1	1			85	2	2	2	2	1	2	2	2	2	3	2	2	2	2	2	2	1	2	2	2	2
	86	1	3	2	2	3	3	1	2	3	3	2	3	2	3	2	2	1	3	3	3	2	2	3	2			86	1	3	2	3	3	2	1	2	2	4	3	3	2	3	2	2	3	2	3	2	3
	87	1	1	1	4	3	1	4	1	1	4	1	1	3	1	1	1	1	1	1	1	1	1	4	1			87	1	1	1	4	2	1	4	1	1	4	1	1	3	1	1	1	1	1	1	1	1
	88	3	2	2	2	3	2	4	1	2	2	2	3	1	2	3	3	2	1	1	2	2	3	4	2			88	2	2	1	2	1	2	4	1	1	2	2	3	1	1	2	1	1	1	1	1	1
	89	1	1	1	1	1	3	2	1	1	2	2	2	1	1	2	2	3	2	2	1	1	1	2	2			89	1	3	3	2	3	3	3	1	1	3	3	3	1	1	3	3	1	3	3	1	2
	90	2	2	2	2	1	1	1	2	1	1	2	2	2	1	1	1	1	1	3	1	2	1	1	1			90	1	1	1	2	1	1	2	1	1	2	2	2	2	1	2	2	1	3	1	1	1
	91	2	2	1	1	1	2	3	1	1	2	2	1	1	1	2	2	2	1	2	1	2	2	3	1			91	2	1	2	2	3	1	3	1	1	2	2	1	1	1	2	1	2	1	2	1	2
	92	3	2	2	2	1	1	1	4	2	1	2	2	2	3	2	3	1	2	2	2	2	1	1	1			92	2	3	2	3	1	4	3	1	1	2	2	3	1	3	2	2	4	2	3	2	1
	93	3	4	3	4	4	4	4	4	3	4	4	4	3	4	4	4	4	4	4	4	4	3	4	4			93	3	4	3	3	4	4	4	3	2	4	4	4	2	3	4	4	2	4	4	4	4
	94	2	1	4	1	3	1	1	2	1	3	1	1	1	1	1	1	1	1	2	2	1	1	1	2			94	1	3	1	2	1	4	1	1	1	1	4	3	1	1	4	4	1	3	1	4	4
	95	2	2	1	4	1	2	2	3	3	4	2	2	2	2	2	2	4	2	2	3	3	1	4	4			95	2	1	3	3	1	2	1	3	1	4	1	2	2	3	2	1	2	2	2	3	2
	96	2	2	2	1	1	2	2	2	1	2	2	2	2	2	2	2	2	2	2	2	2	2	2	2			96	2	2	2	2	1	2	2	2	2	2	2	2	2	2	2	2	2	2	2	2	2
	97	2	2	1	2	3	2	2	2	2	2	2	2	2	2	2	1	2	2	2	2	1	2	3	3			97	2	2	2	2	1	2	3	2	1	3	2	2	2	2	2	2	1	2	2	1	2
	98	1	1	1	1	3	1	1	1	1	1	1	1	1	1	1	1	1	1	1	1	1	1	1	1			98	1	1	1	1	2	1	1	1	1	1	1	1	1	1	1	1	1	1	1	1	1
	99	3	2	2	2	1	3	2	2	2	3	2	2	2	3	2	2	3	4	2	2	1	3	3	3			99	3	2	3	2	2	2	1	2	2	2	1	2	2	2	2	2	2	3	2	2	2
	100	2	2	2	2	1	3	2	2	3	2	4	4	1	3	2	2	3	4	2	2	2	1	4	2			100	1	2	2	1	1	2	1	2	1	2	2	3	1	2	4	1	1	3	3	1	2
	101	1	1	1	1	3	1	1	1	1	1	1	1	2	1	1	1	1	1	1	1	1	1	1	1			101	1	3	4	1	3	1	4	3	1	3	4	3	3	3	4	4	3	4	4	3	3
	102	4	4	3	4	4	4	4	4	4	4	4	4	2	4	4	4	3	3	3	4	4	4	4	3			102	4	4	3	3	4	4	4	4	4	4	4	4	3	4	4	4	2	4	3	4	4
	103	3	3	2	2	1	4	4	3	3	4	4	4	2	4	4	3	3	2	3	3	3	3	4	3			103	2	3	1	2	2	3	3	1	1	4	3	3	2	1	2	2	1	2	2	1	3
	104	2	4	1	1	3	4	3	2	1	4	3	3	1	2	2	3	3	3	3	3	3	3	4	2			104	2	4	1	1	1	3	4	2	1	3	4	3	1	2	4	2	1	4	3	2	3
	105	1	1	1	1	3	1	1	1	2	2	3	3	2	3	2	2	1	1	2	1	1	1	1	1			105	1	1	1	1	3	1	1	1	2	2	3	3	2	3	1	1	1	1	3	1	1
	106	3	3	3	3	1	4	1	4	3	2	2	2	3	2	2	3	1	2	2	3	3	1	1	1			106	1	1	1	1	2	1	1	1	1	1	1	1	1	1	1	1	1	1	1	1	1
	107	2	2	1	1	1	3	2	1	2	2	2	2	2	2	3	2	3	2	1	2	2	2	3	1			107	1	1	1	1	2	2	1	1	1	1	1	1	1	1	2	1	1	1	1	1	1
	108	2	2	2	2	3	3	4	2	3	4	4	2	1	2	2	3	4	3	3	1	3	3	2	4			108	2	2	1	3	1	2	4	3	1	2	3	3	1	1	3	2	2	2	4	1	4
	109	3	2	1	1	4	4	2	2	4	1	2	3	1	3	4	4	4	4	1	2	2	2	4	1			109	2	4	1	4	4	4	3	2	4	3	4	4	1	4	4	4	4	4	4	4	4
	110	2	1	2	1	1	2	1	1	2	1	1	2	3	2	2	2	2	2	2	2	2	2	2	2			110	3	3	2	4	1	4	4	2	2	3	2	2	2	2	2	3	2	3	2	1	3
	111	1	2	1	1	3	2	1	2	2	2	2	2	1	2	2	2	4	3	1	1	1	2	2	2			111	1	1	1	1	2	1	1	1	2	1	2	1	1	1	2	2	1	3	1	1	1
	112	2	1	2	2	1	3	2	3	3	2	2	2	1	2	3	2	2	3	2	2	2	2	2	3			112	2	1	3	4	1	2	2	2	2	2	2	2	1	2	2	2	3	3	3	2	2
	113	1	4	1	1	3	4	3	2	2	3	4	4	1	2	3	4	4	3	2	3	3	2	4	3			113	1	4	1	4	1	3	4	2	1	3	3	3	1	1	3	4	2	3	2	2	4
	114	2	2	1	1	1	2	2	2	2	3	2	2	2	2	2	2	2	2	2	2	2	2	2	3			114	3	2	2	1	3	3	2	3	3	3	2	2	3	2	2	2	2	3	2	3	2
	115	2	1	2	1	3	1	1	1	1	3	2	2	1	1	1	1	1	1	2	1	2	1	1	1			115	1	1	1	1	2	1	1	1	1	1	1	1	1	1	1	1	1	1	1	1	1
	116	1	1	1	1	1	1	1	2	1	1	1	1	3	1	1	1	1	2	1	1	1	3	2	1			116	1	1	1	1	1	1	4	1	1	1	1	1	4	1	1	1	1	1	1	1	1
	117	1	2	1	1	1	2	2	3	2	3	2	2	1	3	3	2	1	2	4	3	4	1	4	1			117	1	2	1	1	1	4	2	1	1	2	1	1	1	1	3	2	1	1	3	2	4
	118	1	2	1	1	1	3	2	2	2	2	2	2	2	1	3	2	2	2	2	2	2	2	2	2			118	1	1	1	1	1	4	1	2	1	2	2	1	2	1	4	3	1	2	2	2	1
	119	1	2	2	1	3	2	2	1	1	1	2	1	1	2	2	1	1	2	1	2	2	1	2	1			119	2	3	2	4	2	2	3	1	1	1	2	1	3	1	4	1	2	1	1	1	1
	120	1	2	2	1	3	1	1	1	2	1	2	2	3	1	1	1	1	1	2	2	1	2	1	1			120	1	2	1	1	2	2	2	1	1	1	2	1	1	2	2	2	1	2	1	2	1
	121	3	2	2	2	3	3	3	2	3	3	3	3	2	2	3	2	3	2	3	2	2	3	3	4			121	2	2	2	1	1	2	1	2	2	2	2	2	2	2	2	2	1	2	2	3	2
	122	1	1	2	2	3	1	1	2	1	1	1	1	1	1	1	1	1	1	1	1	2	1	1	1			122	3	3	3	1	3	3	3	3	3	3	3	1	3	3	3	3	1	1	3	3	3
[truncated: 3 more columns]

## Sheet: trypophobia questionnaire
No.	Feel skin crawl	Feel aversion, disgust or repulsion	Feel uncomfortable or uneasy	Shiver	Feel freaked out	Feel itchiness	Chills	Have goosebumps	Feel nervous (e.g.,heart pounding, butterflies in stomach, sweating, stomach ache, etc.)	Feel anxious, full of dread or fearful	Feel sick or nauseous	Feel like going crazy	Feel like panicking or screaming	Have an urge to destroy the holes	Have trouble breathing	Feel like crying	Vomit	Feel at peace	Want to laugh
1	9	9	9	9	7	8	9	9	9	8	8	8	8	7	7	7	7	1	1
2	10	10	9	1	7	7	8	6	5	6	6	5	9	1	4	1	2	1	1
3	9	9	8	6	6	7	9	9	7	7	8	6	6	6	6	6	6	1	2
4	6	6	5	1	1	1	3	1	2	2	2	1	1	1	2	1	1	1	3
5	7	7	7	3	3	4	5	3	1	2	2	1	1	1	1	1	1	1	1
6	7	7	8	4	4	4	3	2	2	2	3	1	1	1	1	1	1	1	1
7	8	8	7	7	7	8	8	8	8	8	7	6	6	7	4	4	6	2	3
8	2	1	1	1	1	1	1	1	2	1	1	1	1	1	1	1	1	1	1
9	10	9	7	4	3	9	6	7	4	4	6	3	3	2	3	5	7	1	1
10	10	10	9	6	3	8	9	10	7	6	7	5	6	7	7	3	5	1	1
11	2	3	1	1	1	1	1	1	1	1	3	1	1	1	1	1	1	1	1
12	8	8	6	5	5	5	5	5	3	3	5	2	1	1	1	1	1	1	1
13	7	7	6	4	3	7	5	5	6	4	5	1	2	4	4	1	2	2	2
14	6	5	5	3	3	3	3	4	3	2	2	2	2	3	2	2	2	1	1
15	9	9	9	5	5	9	9	9	5	5	7	3	5	3	3	3	3	1	1
16	6	6	5	6	6	6	6	6	6	6	6	6	5	6	6	5	5	6	6
17	7	6	6	3	3	6	6	5	3	3	6	3	3	3	3	3	4	1	1
18	10	10	10	10	10	10	10	10	10	10	10	10	10	1	10	1	1	1	1
19	6	10	5	1	1	1	1	1	1	1	6	5	1	1	6	1	3	1	1
20	6	6	2	2	2	5	5	6	1	1	1	1	1	1	1	1	1	1	1
21	7	7	5	3	3	6	4	4	3	3	3	3	3	2	2	2	3	2	2
22	7	7	6	3	3	4	5	5	5	5	6	2	2	5	5	5	5	1	2
23	7	8	7	3	3	4	8	7	4	4	7	3	3	1	1	1	2	1	1
24	10	10	10	10	10	10	10	10	10	10	10	10	10	1	10	10	7	1	1
25	6	7	7	6	6	7	7	7	6	7	6	6	6	6	7	3	6	1	1
26	1	2	2	1	1	1	1	1	1	1	1	1	1	1	1	1	1	1	1
27	7	6	6	5	5	5	5	5	5	5	5	5	6	5	5	6	6	3	3
28	6	6	6	6	6	6	6	6	6	6	6	6	6	6	6	4	6	2	2
29	8	8	8	7	5	7	7	7	6	7	6	3	6	6	6	3	7	1	1
30	8	7	6	6	4	7	8	7	4	4	6	4	3	8	5	2	4	1	1
31	8	6	7	5	5	4	5	4	7	5	8	4	6	1	4	1	4	1	1
32	5	4	3	3	5	3	6	6	6	2	2	2	2	1	2	1	2	1	1
33	4	4	2	1	1	1	1	1	1	1	1	1	1	1	1	1	1	1	1
34	6	6	6	6	1	6	5	6	1	1	1	1	1	1	1	1	1	1	1
35	5	4	4	5	5	5	5	5	5	5	5	5	5	4	5	5	5	5	5
36	5	5	5	5	5	9	6	4	1	1	1	1	1	1	1	1	1	1	1
37	10	10	10	9	4	9	9	9	6	6	6	4	4	1	3	3	3	1	1
38	8	6	3	1	1	6	6	6	2	2	3	1	1	1	1	1	1	1	1
39	10	10	10	1	1	10	10	10	2	9	9	5	1	1	6	1	9	1	1
40	4	6	2	1	1	2	2	2	3	2	1	1	1	2	1	1	1	1	1
41	3	3	1	1	1	3	3	3	3	1	1	1	1	1	1	1	1	1	1
42	7	6	3	1	1	2	1	2	1	1	1	1	1	3	1	1	2	2	3
43	8	8	8	6	5	5	5	4	3	3	3	2	2	1	1	1	1	3	3
44	10	10	10	5	9	10	10	10	10	10	10	10	10	10	10	8	9	1	1
45	6	6	6	1	1	1	1	1	2	2	1	1	1	1	1	1	1	1	1
46	7	7	6	2	2	3	2	2	1	1	1	1	1	3	1	1	1	1	1
47	8	8	8	8	8	8	8	6	8	7	7	7	7	7	7	2	7	2	2
48	6	6	5	6	5	6	6	6	5	5	5	4	5	5	5	5	5	1	1
49	2	2	2	2	2	2	2	2	2	2	2	2	2	2	2	2	2	1	1
50	7	8	8	1	1	6	6	6	1	6	1	1	6	7	1	1	1	1	1
51	7	7	6	3	1	4	3	1	1	2	1	1	1	1	1	1	1	1	1
52	6	6	6	1	1	2	2	6	5	4	4	1	1	1	1	1	1	1	1
53	2	2	2	1	1	1	1	1	1	1	1	1	1	2	1	1	1	3	3
54	2	3	1	1	1	2	1	1	1	1	1	1	1	1	1	1	1	1	1
55	3	3	4	2	1	2	2	1	1	2	2	1	1	3	2	1	2	5	2
56	2	2	2	1	1	3	1	2	1	1	1	1	1	4	1	1	1	1	1
57	10	10	10	1	1	10	10	10	10	10	10	10	10	1	10	1	10	1	1
58	4	5	3	1	1	2	2	1	1	2	1	1	2	2	2	2	3	2	2
59	7	7	7	7	7	7	7	7	7	7	7	7	7	7	7	7	7	5	6
60	5	5	5	5	5	7	7	1	6	6	6	6	1	10	1	1	1	1	1
61	2	2	1	1	1	1	1	1	1	1	1	1	1	1	1	1	1	2	2
62	10	10	9	8	4	9	9	9	5	7	7	4	4	2	9	6	9	1	1
63	3	3	6	2	2	3	6	5	5	4	3	3	3	6	4	1	1	2	2
64	10	10	10	10	10	10	10	10	10	10	10	10	10	10	10	10	10	1	1
65	5	8	8	6	3	8	8	8	7	5	7	5	3	3	3	1	4	1	1
66	7	8	8	1	1	1	1	1	1	1	1	2	1	1	1	1	1	1	1
67	4	6	6	3	3	6	5	5	6	6	5	4	4	8	4	4	4	3	7
68	6	5	1	1	1	1	1	1	1	1	1	1	1	1	1	1	1	1	1
69	5	5	5	5	3	7	5	5	7	7	5	5	5	5	5	5	5	5	5
70	7	8	4	3	2	8	3	7	2	1	1	1	1	1	1	1	1	1	1
71	1	2	2	1	1	1	1	1	1	1	1	1	1	1	1	1	1	1	5
72	5	8	10	6	1	4	9	5	3	1	2	6	4	1	1	1	3	1	1
73	8	8	8	7	2	7	7	7	6	2	3	1	2	2	2	1	3	1	1
74	10	8	6	5	4	7	5	6	4	4	5	5	5	6	6	6	4	7	5
75	6	7	6	2	2	2	3	3	3	4	2	2	4	5	6	2	2	2	2
76	5	5	5	5	5	5	5	5	5	5	5	5	5	5	5	5	5	1	1
77	4	5	2	1	1	2	2	1	1	1	1	1	1	1	1	1	1	4	4
78	10	10	10	1	1	3	3	4	1	1	8	2	2	10	8	1	9	1	5
79	6	8	5	1	1	1	2	2	3	2	1	1	1	1	1	1	1	1	1
80	3	3	3	1	1	3	2	1	1	1	1	1	1	1	1	1	1	1	1
81	7	6	8	3	1	9	6	4	1	2	6	5	5	6	1	1	1	1	5
82	3	3	3	1	1	1	1	1	1	2	2	1	1	1	1	1	1	5	2
83	5	7	5	3	3	7	7	3	6	3	3	3	6	8	3	3	3	1	1
84	8	8	8	6	5	8	7	6	6	7	5	4	5	3	6	5	7	1	1
85	5	5	5	5	5	5	5	5	5	5	5	5	5	5	5	5	5	5	5
86	3	4	3	5	4	5	4	4	4	4	4	5	5	4	5	5	5	5	5
87	10	10	10	10	10	10	10	10	10	10	10	10	10	10	10	10	10	1	1
88	7	8	6	1	1	2	1	1	2	2	1	1	1	1	1	1	1	1	1
89	6	6	6	1	1	1	6	6	1	1	1	1	1	1	1	1	1	1	1
90	4	4	4	1	1	1	1	3	3	3	4	1	1	1	2	2	2	1	1
91	5	3	3	3	1	3	1	1	1	1	3	1	1	10	1	1	1	5	5
92	2	1	1	1	1	1	1	1	1	1	1	1	1	1	1	1	1	3	5
93	10	10	10	5	5	5	10	10	10	5	10	5	5	5	5	5	5	5	5
94	10	6	2	1	1	7	10	10	1	4	3	1	1	1	1	1	1	1	1
95	5	8	6	6	5	5	7	6	5	8	7	4	3	5	7	2	3	2	4
96	10	10	9	9	9	9	9	9	9	8	8	8	10	8	7	8	9	1	1
97	8	8	7	2	2	2	6	6	2	2	7	2	2	2	1	1	2	1	1
98	6	8	2	2	1	2	3	2	2	1	1	1	1	1	1	1	1	1	1
99	10	8	8	5	2	4	7	7	6	5	6	2	3	5	5	6	6	1	1
100	7	7	6	5	4	3	4	3	4	3	3	3	3	3	3	2	2	2	2
101	3	3	3	1	1	1	1	1	1	1	1	1	1	1	1	1	1	5	5
102	1	1	1	1	1	1	1	1	1	1	1	1	1	6	1	1	1	4	2
103	1	1	1	1	1	1	1	1	1	1	1	1	1	1	1	1	1	3	6
104	5	5	5	5	5	5	5	5	5	5	5	5	5	5	5	5	5	5	5
105	4	3	3	3	2	2	2	2	3	3	2	2	2	2	2	2	2	2	2
106	7	7	2	1	1	5	5	2	1	2	7	1	1	8	5	1	6	1	1
107	4	4	2	2	2	5	2	2	2	2	2	4	4	2	2	2	1	1	1
108	10	10	9	3	6	7	10	10	8	7	9	10	6	4	9	4	7	1	1
109	10	10	10	1	1	9	5	5	3	9	5	1	1	1	1	1	2	1	1
110	7	9	6	3	3	4	3	4	1	3	7	9	5	5	5	1	1	1	1
111	8	7	7	2	4	9	8	6	6	6	7	4	5	5	7	2	5	1	7
112	4	5	5	4	3	3	4	4	5	4	4	2	2	2	2	2	2	1	2
113	5	8	5	1	2	4	6	1	1	1	5	5	3	1	2	1	2	1	1
114	6	6	5	5	4	5	4	4	3	3	3	3	3	3	3	3	3	3	2
115	8	9	8	3	1	9	6	4	2	1	7	4	1	8	3	1	6	1	1
116	2	3	1	1	1	1	1	1	1	1	2	1	1	1	1	1	2	1	1
117	7	9	9	2	2	8	9	7	7	6	7	2	6	2	9	2	8	1	2
118	2	2	1	1	1	1	1	1	1	1	1	1	1	1	1	1	1	1	1
119	8	9	7	4	4	3	3	3	4	4	6	5	4	9	4	3	3	1	2
120	4	4	5	2	2	3	3	3	3	3	2	2	2	3	3	2	2	2	3
121	8	8	8	8	7	7	7	8	8	7	7	6	6	3	5	5	5	1	1
122	6	6	6	4	4	6	6	6	4	4	6	6	4	3	4	4	4	1	4

## Sheet: discomfort rating score
single	No.	1 eye	4 eyes	16 eyes	64 eyes			pair	No.	2 eyes	4 eyes	16 eyes	64 eyes
	1	9.5	9	10	10				1	7.5	7	7	8
	2	8.5	8.5	10	10				2	3.5	3	8.5	9.5
	3	9	9	10	10				3	9	9	10	10
	4	4.5	5	7	8				4	3.5	5	6	8
	5	8	8	8	9				5	7.5	7	8	9
	6	6.5	6.5	8.5	9.5				6	6	7	8.5	10
	7	8	8	8.5	9				7	8	8	8	8.5
	8	6	6	9	9				8	8	8	9	9
	9	5.5	6	7	8				9	5	6	6.5	7.5
	10	2.5	4	7.5	9.5				10	2.5	5	7	8
	11	4	3	5.5	7				11	0	3.5	4	7
	12	6	5	6.5	8.5				12	3.5	4	4.5	6.5
	13	9	7	8	8				13	7	7	7	7
	14	8	8	9	10				14	8	8.5	9.5	10
	15	3.5	4	6	6.5				15	2.5	3	5	7
	16	8	8	9	8.5				16	8	9	9	10
	17	7	8	9	10				17	7	8	9	10
	18	5	8.5	10	10				18	2.5	7	10	10
	19	6.5	7.5	8	10				19	5	7	8	10
	20	10	5.5	7.5	7.5				20	6	8.5	8.5	6.5
	21	6	6	7	8.5				21	5.5	6	6.5	9
	22	6	6.5	7.5	9.5				22	6	7.5	8	10
	23	7	8.5	9	9				23	8	8.5	8.5	8
	24	8	10	10	10				24	8.5	10	10	10
	25	8.5	8	9	9.5				25	8	8	9	10
	26	2.5	3	3	4				26	1	2.5	2	2.5
	27	8	8	9	10				27	8	8	9	10
	28	5	6	6.5	7				28	3.5	5	6.5	8
	29	6	8	9.5	10				29	3	5	8.5	10
	30	3	5	8	6.5				30	1.5	4.5	5.5	6.5
	31	4	7	8.5	10				31	5.5	7	8	9
	32	1	2	5	7.5				32	0.5	1	3	4.5
	33	5	6.5	8.5	9				33	3.5	5	6	8
	34	6	8	9	10				34	5	6	8	9
	35	6	6	6	6				35	6	6	6	6
	36	9.5	9.5	10	10				36	8.5	9	10	10
	37	9	8	9	10				37	9	9	10	10
	38	8	6	8	10				38	7	6.5	7.5	10
	39	10	10	10	10				39	10	10	10	10
	40	0	0	1	2				40	0	0	1	1
	41	6	5	5	5				41	6	6	6	5.5
	42	1	2.5	4	5.5				42	1.5	3	4.5	6.5
	43	8	8	7.5	8				43	7	7	7.5	8
	44	9	9	9.5	10				44	9	9	9.5	10
	45	10	10	10	10				45	4	8.5	9	9.5
	46	2	1.5	3	4				46	1	2	3	4
	47	10	10	10	10				47	10	10	10	10
	48	10	10	10	10				48	10	10	10	10
	49	1	1	1	1				49	1	1	1	1
	50	4	7	8.5	10				50	2	6	7.5	10
	51	5	5	9.5	10				51	2	3	8.5	9.5
	52	5	5.5	7	8				52	5.5	6	6	6.5
	53	6	8	8	8				53	5.5	7	7.5	8
	54	0	1	1.5	3				54	0	0	1	2
	55	3	2.5	3	3				55	2	3	3.5	3.5
	56	4.5	3.5	5	6.5				56	4.5	4	4	4
	57	10	10	10	10				57	7.5	10	10	10
	58	4	5.5	6	7.5				58	3	5	6	7
	59	6	6	6	7				59	6	6	6	7
	60	10	8.5	10	10				60	10	10	10	10
	61	1.5	2.5	4	5				61	2	2.5	3.5	5
	62	7	8	10	10				62	6.5	9	9.5	10
	63	3	4.5	6	6				63	3.5	4	5	8
	64	10	10	10	10				64	10	10	10	10
	65	4.5	6.5	8.5	10				65	3.5	6	7	9.5
	66	10	10	10	10				66	7.5	3.5	10	10
	67	4	6	6	7				67	2.5	3	3	2.5
	68	7	4	5.5	8.5				68	3.5	7	5	8
	69	8	8	8	10				69	8	8	10	10
	70	4	4	5	5				70	4	4.5	4.5	5
	71	2	6	5	5				71	2	2	2	2
	72	7.5	10	10	10				72	10	10	10	10
	73	9	9	10	10				73	7.5	9	10	10
	74	10	10	10	10				74	10	10	10	10
	75	2	6.5	8	9				75	2.5	7	8	9
	76	5	5.5	6	6				76	6	6	6	6
	77	7	6	6.5	6.5				77	7	6	6	7
	78	10	10	9.5	10				78	10	10	10	10
	79	8	5.5	8	9.5				79	6.5	6	7.5	9.5
	80	6	5.5	7	7				80	5	6	6	7
	81	10	10	10	10				81	10	10	10	10
	82	3	3.5	4.5	6				82	5.5	3	5	6
	83	3	3.5	3.5	3.5				83	2	2	2	2
	84	1	5	8.5	10				84	2	3.5	4	6.5
	85	5.5	6	6	6				85	5	5	5	5.5
	86	3	4	4.5	4.5				86	4.5	3.5	3.5	3.5
	87	9	10	10	10				87	5	9	10	10
	88	2.5	4	5	8				88	5	5.5	5.5	7
	89	6	8	9	9				89	3	3.5	6.5	9
	90	4.5	4.5	6	8				90	4	4.5	4.5	7
	91	0	2	0	2.5				91	0	0.5	0	3
	92	7.5	8	8.5	9.5				92	4.5	6	8.5	10
	93	10	10	10	10				93	10	10	10	10
	94	4.5	5	6	6.5				94	2.5	3.5	3.5	4
	95	1.5	3	4.5	8				95	1.5	2.5	4.5	6
	96	8.5	9	10	10				96	6.5	7	10	10
	97	6.5	7	8	9.5				97	1	5	7.5	10
	98	1	1	1	4				98	0	1	1.5	5
	99	7	7.5	8.5	10				99	7	7.5	8	10
	100	5	5.5	7.5	9				100	5	5	6	8
	101	3	0.5	2.5	1.5				101	1	1	2	2
	102	4	4	4	5				102	3	3	3	3.5
	103	1.5	5	3.5	4				103	2	0.5	1	1
	104	2	8	8	8				104	2	5	5	5
	105	9	9.5	10	10				105	8.5	9.5	10	10
	106	6	7.5	9	10				106	7	7	8	10
	107	7	6	8.5	9				107	4	5	7	8
	108	5.5	4	4.5	6.5				108	5.5	5	6	7
	109	6	8.5	8.5	10				109	3.5	3.5	5	9.5
	110	10	8	10	10				110	10	10	10	10
	111	6.5	3	4	6				111	2	3.5	4.5	5.5
	112	9	7.5	8	9				112	8	7.5	7.5	7
	113	4.5	5	8	8				113	3	5	7	8
	114	3.5	5	6.5	8				114	4	3.5	6.5	8
	115	0	8.5	8	9.5				115	0.5	3.5	6.5	6
	116	0.5	0	0	0				116	0	0	0	0
	117	10	8	10	10				117	9	8.5	10	10
	118	9	8	8	10				118	7	7	7	9.5
	119	8.5	8.5	9.5	10				119	7	7	9	10
	120	6.5	6.5	7	6				120	7	6	6	6
	121	5.5	7	8	8				121	3	7	7.5	8
	122	4	6.5	7.5	10				122	2.5	5	5.5	7.5
